# Supplementary material for: The First Records of the In Silico Antiviral and Antibacterial Actions of Molecules Detected in Extracts of Algerian Fir (Abies numidica De Lannoy) Using LC-MS/MS Analysis
Source: MDPI journal article supplement (doi:10.3390/plants13091246), 2024-04-30
Supplement: s1 [file s1]

**Table S1.** Superposition and intermolecular interactions between the different ligand determined in Algerian fir and the main protease of Sars-cov 2 virus using PM7 Method (Covid19)

| Compounds | Molecular Docking                                                                  | H-Bond                                                                              | Hydrophobic                                                                          | Interactions                                                                         |
|-----------|------------------------------------------------------------------------------------|-------------------------------------------------------------------------------------|--------------------------------------------------------------------------------------|--------------------------------------------------------------------------------------|
| Apigenin  |   |   |   |   |
| Apigetrin |  |  |  |  |

|                  |                                                                                    |                                                                                     |                                                                                      |                                                                                     |
|------------------|------------------------------------------------------------------------------------|-------------------------------------------------------------------------------------|--------------------------------------------------------------------------------------|-------------------------------------------------------------------------------------|
| Astragalin       | 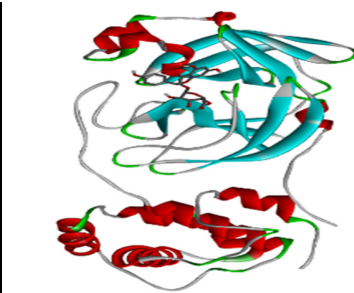  |   |   |  |
| chlorogenic Acid |   |   |   |                                                                                     |
| Hesperidin       |  |  |  |                                                                                     |

|                       |                                                                                    |                                                                                     |                                                                                      |                                                                                      |
|-----------------------|------------------------------------------------------------------------------------|-------------------------------------------------------------------------------------|--------------------------------------------------------------------------------------|--------------------------------------------------------------------------------------|
| Hyperoside            |   |   |   |   |
| Luteolin              |   |   |   |   |
| Luteoline-7-glucoside |  |  |  |  |



|                     |                                                                                    |                                                                                     |                                                                                      |                                                                                      |
|---------------------|------------------------------------------------------------------------------------|-------------------------------------------------------------------------------------|--------------------------------------------------------------------------------------|--------------------------------------------------------------------------------------|
| Protocatechuic Acid |   |   |   |   |
| Quercetin           |   |    |   |   |
| Quercitrin          |  |  |  |  |





**Table S2.** Superposition and intermolecular interactions between the different ligand determined in Algerian fir and 4PRV presents in *E. coli* using PM7 Method

| Molecule | Molecular Docking                                                                 | H-Bond                                                                             | Hydrophobic                                                                         | Interactions                                                                        |
|----------|-----------------------------------------------------------------------------------|------------------------------------------------------------------------------------|-------------------------------------------------------------------------------------|-------------------------------------------------------------------------------------|
| Apigenin | 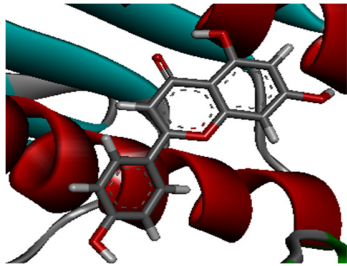 |  |  |  |

Apigetrin

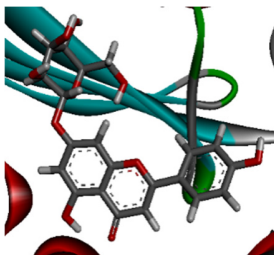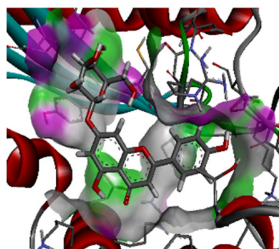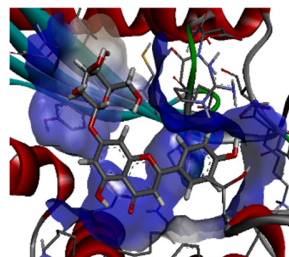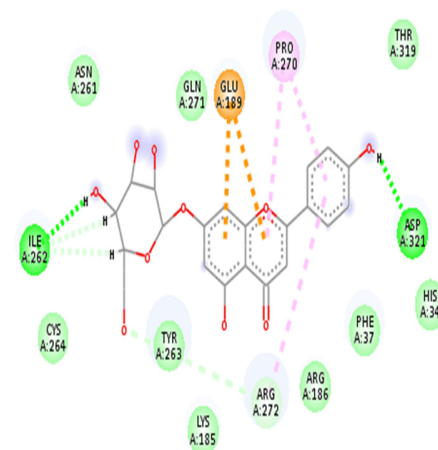

Astragalin

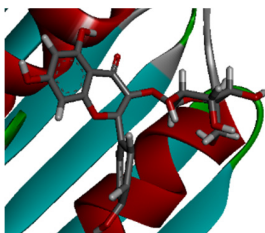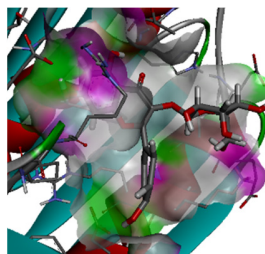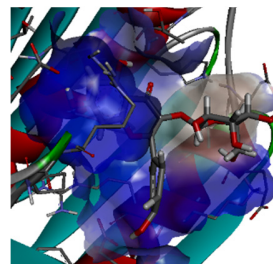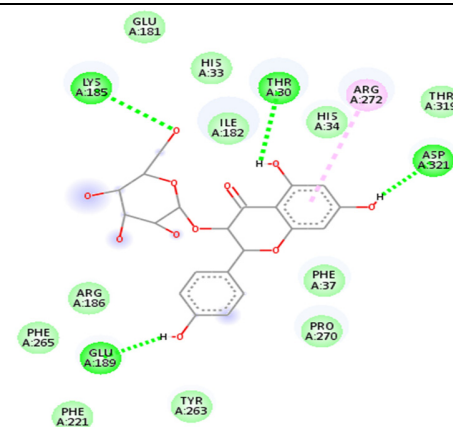



Chlorogenic Acid

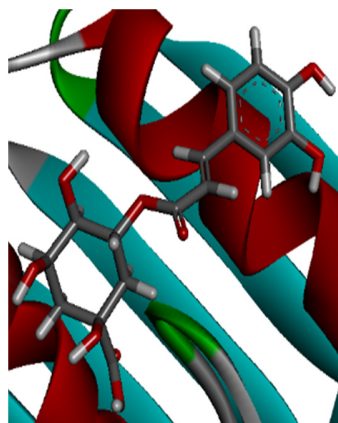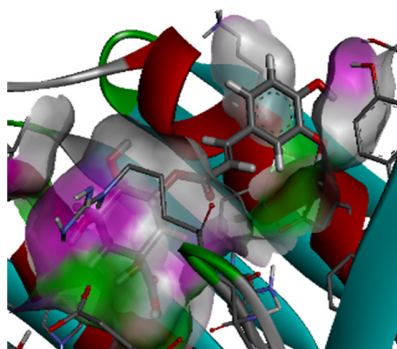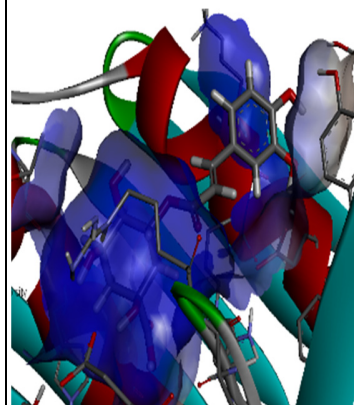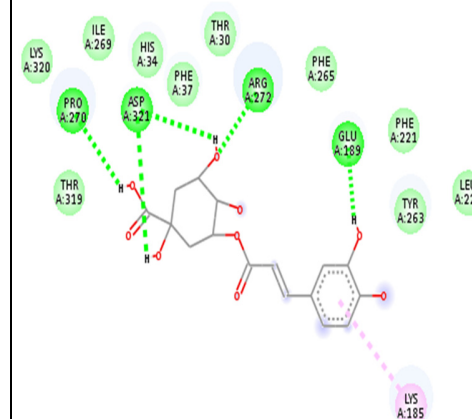

Hesperidin

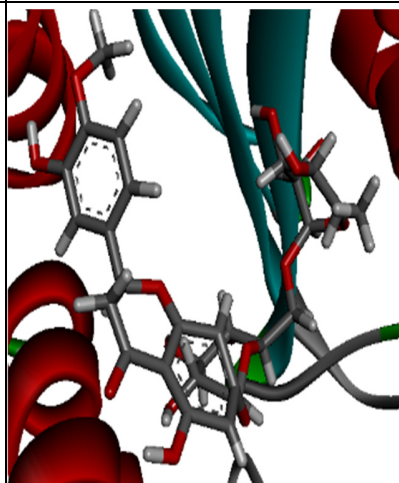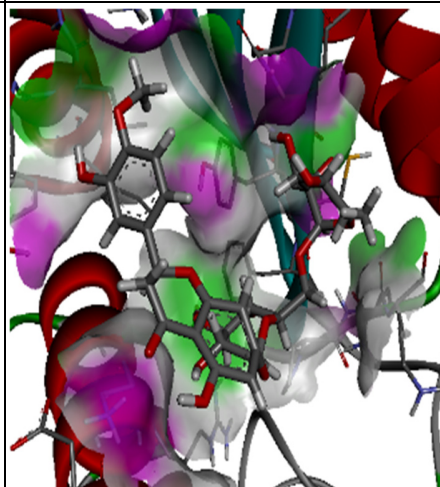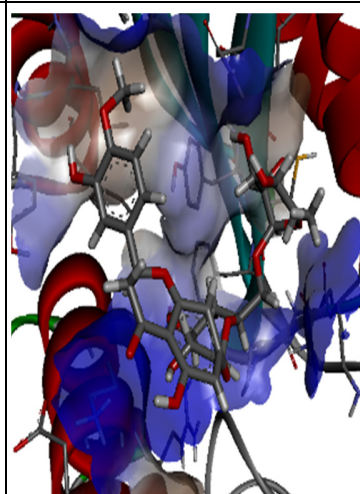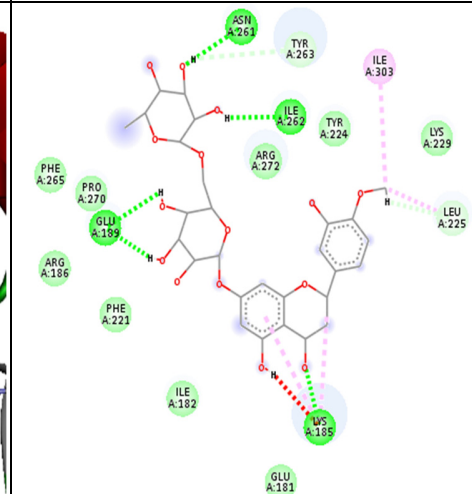

Hyperoside

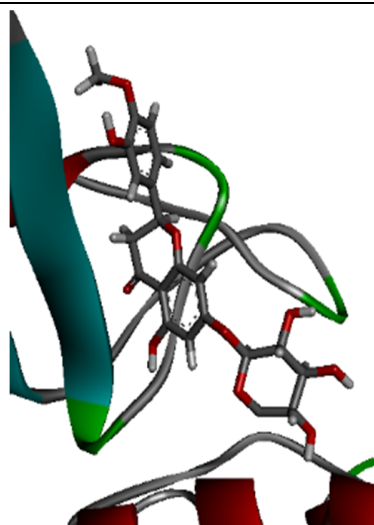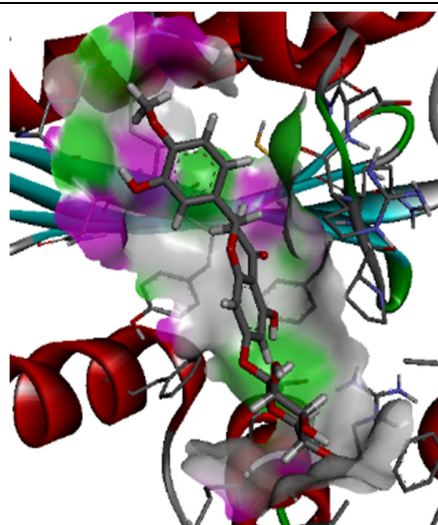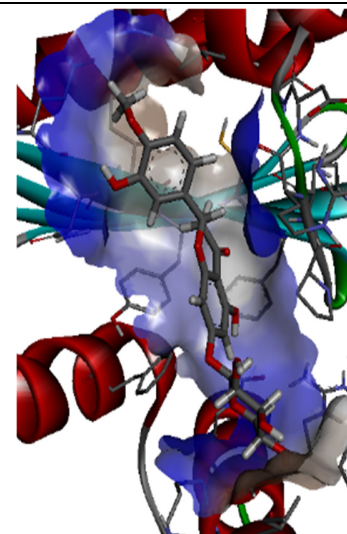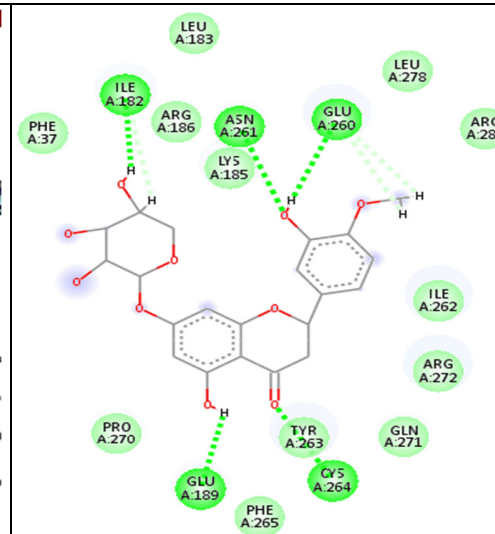

Luteolin

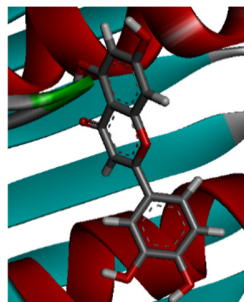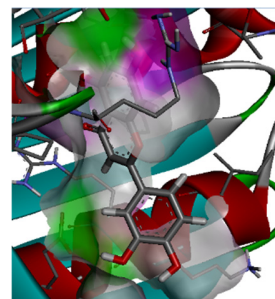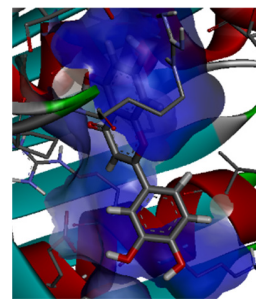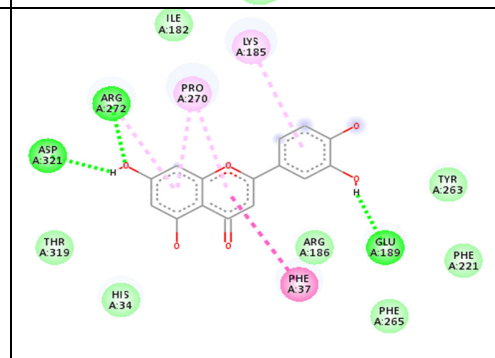

Luteoline-7-glucoside

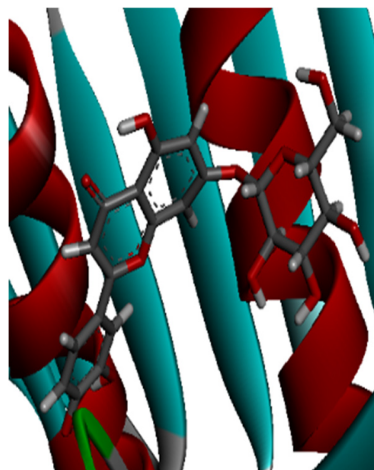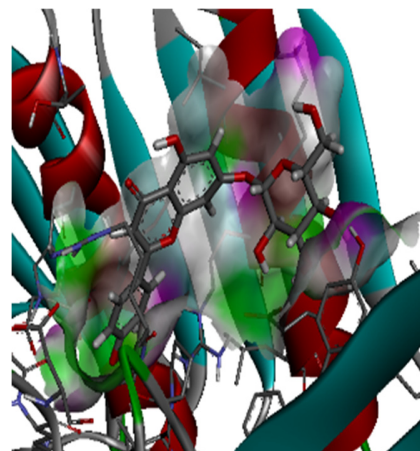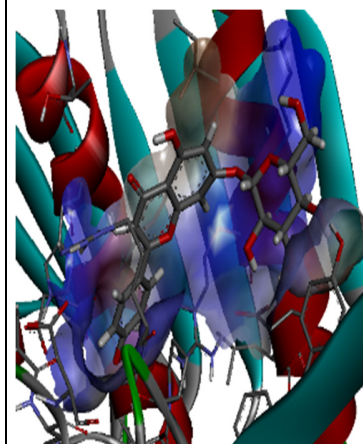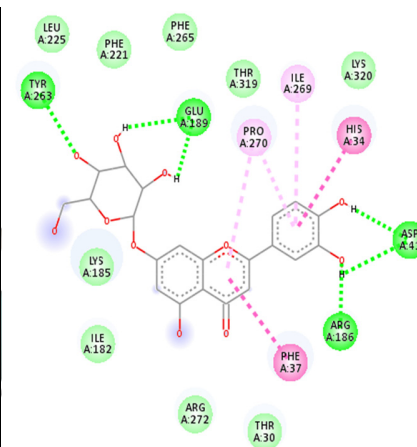

Protocatechuic Acid

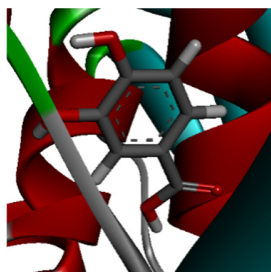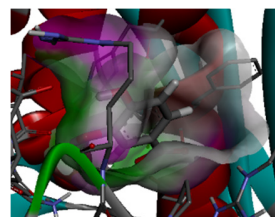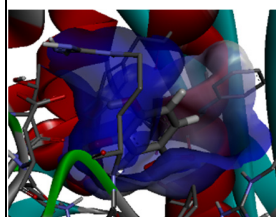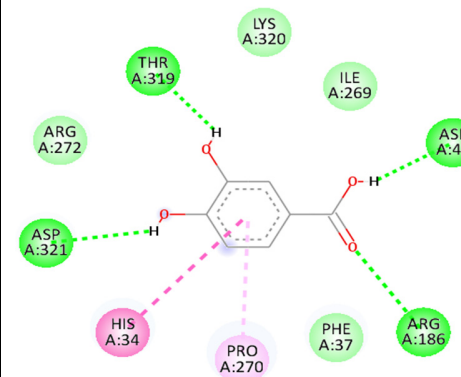



|            |                                                                                    |                                                                                     |                                                                                      |                                                                                      |
|------------|------------------------------------------------------------------------------------|-------------------------------------------------------------------------------------|--------------------------------------------------------------------------------------|--------------------------------------------------------------------------------------|
| Quercetin  | 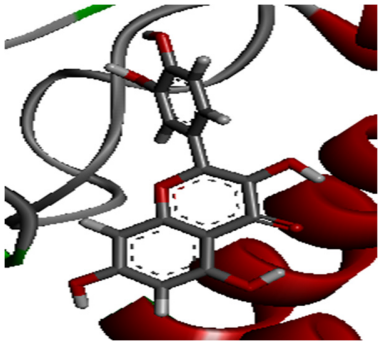  |   |   |   |
| Quercitrin |  |  |  |  |

|             |                                                                                   |                                                                                    |                                                                                     |                                                                                      |
|-------------|-----------------------------------------------------------------------------------|------------------------------------------------------------------------------------|-------------------------------------------------------------------------------------|--------------------------------------------------------------------------------------|
| Rutin       | 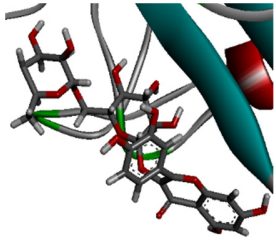 |  |  |   |
| Tigecycline |  |  |  |  |

**Table S3.** Superposition and intermolecular interactions between the different ligand determined in Algerian fir and *S. aureus* 4URO protein receptor using PM7 Method

| Molecule  | Molecular Docking                                                                  | H-Bond                                                                              | Hydrophobic                                                                          | Interactions                                                                         |
|-----------|------------------------------------------------------------------------------------|-------------------------------------------------------------------------------------|--------------------------------------------------------------------------------------|--------------------------------------------------------------------------------------|
| Apigenin  | 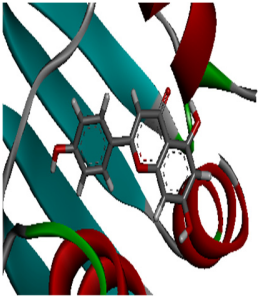  |   |   |   |
| Apigetrin |  |  |  |  |



|                         |                                                                                   |                                                                                     |                                                                                      |                                                                                      |
|-------------------------|-----------------------------------------------------------------------------------|-------------------------------------------------------------------------------------|--------------------------------------------------------------------------------------|--------------------------------------------------------------------------------------|
| <p>Astragalin</p>       | 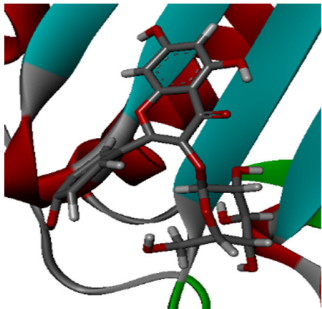 |   |   |   |
| <p>Chlorogenic Acid</p> |  |  |  |  |

|            |                                                                                    |                                                                                      |                                                                                       |                                                                                      |
|------------|------------------------------------------------------------------------------------|--------------------------------------------------------------------------------------|---------------------------------------------------------------------------------------|--------------------------------------------------------------------------------------|
| Hesperidin | 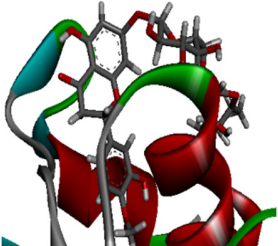  |    |    |   |
| Hyperoside |   |    |    |   |
| Luteolin   |  |  |  |  |

|                              |                                                                                    |                                                                                     |                                                                                      |                                                                                      |
|------------------------------|------------------------------------------------------------------------------------|-------------------------------------------------------------------------------------|--------------------------------------------------------------------------------------|--------------------------------------------------------------------------------------|
| <p>Luteoline-7-glucoside</p> | 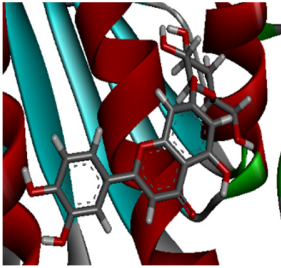  |   |   |   |
| <p>Protocatechuic Acid</p>   |   |   |   |   |
| <p>Quercetin</p>             |  |  |  |  |



|            |                                                                                   |                                                                                    |                                                                                     |                                                                                                                                                                                                                                                                                  |
|------------|-----------------------------------------------------------------------------------|------------------------------------------------------------------------------------|-------------------------------------------------------------------------------------|----------------------------------------------------------------------------------------------------------------------------------------------------------------------------------------------------------------------------------------------------------------------------------|
| Quercitrin | 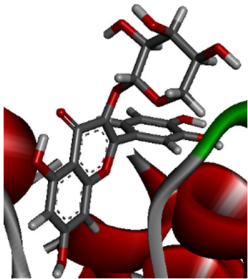 |  |  |  <p>Residues involved in Quercitrin binding: ALA A:36, GLU A:33, ASP A:32, ARG A:59, PRO A:62, GLY A:60, GLY A:58, THR A:129, SER A:30, ASP A:56, ILE A:61, ASN A:29, ILE A:77, GLY A:81.</p> |
| Rutin      |  |  |  |  <p>Residues involved in Rutin binding: ASP A:25, ARG A:154, TRP A:24, ILE A:11, TRP A:10, VAL A:86, VAL A:52, ASP A:32, GLU A:25, GLY A:53.</p>                                              |

Penicillin

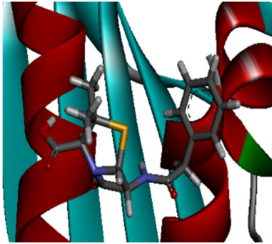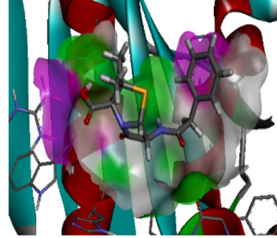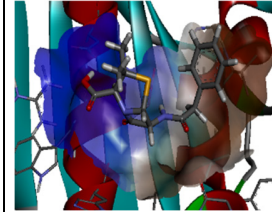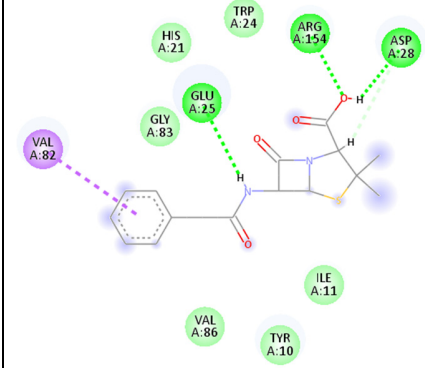

+: Van der Waals; +: Pi-Cation; +: Unfavorable Acceptor -Acceptor; +: Pi-Donor Hydrogen Bond; +: Pi-Sulfur; +: Pi-Sigma; +: Conventional Hydrogen Bond; +: Sulfur -X; +: Pi-Alkyl.
